# Supplementary figures and images for: Anchored phosphatases modulate glucose homeostasis
Source: PubMed Central journal article supplement — EMBO J. 2012 Aug 31;31(20):3991–4004. doi: 10.1038/emboj.2012.244 (PMC3474922; doi:10.1038/emboj.2012.244), 2012-08-31

Fig. S6 Source Data

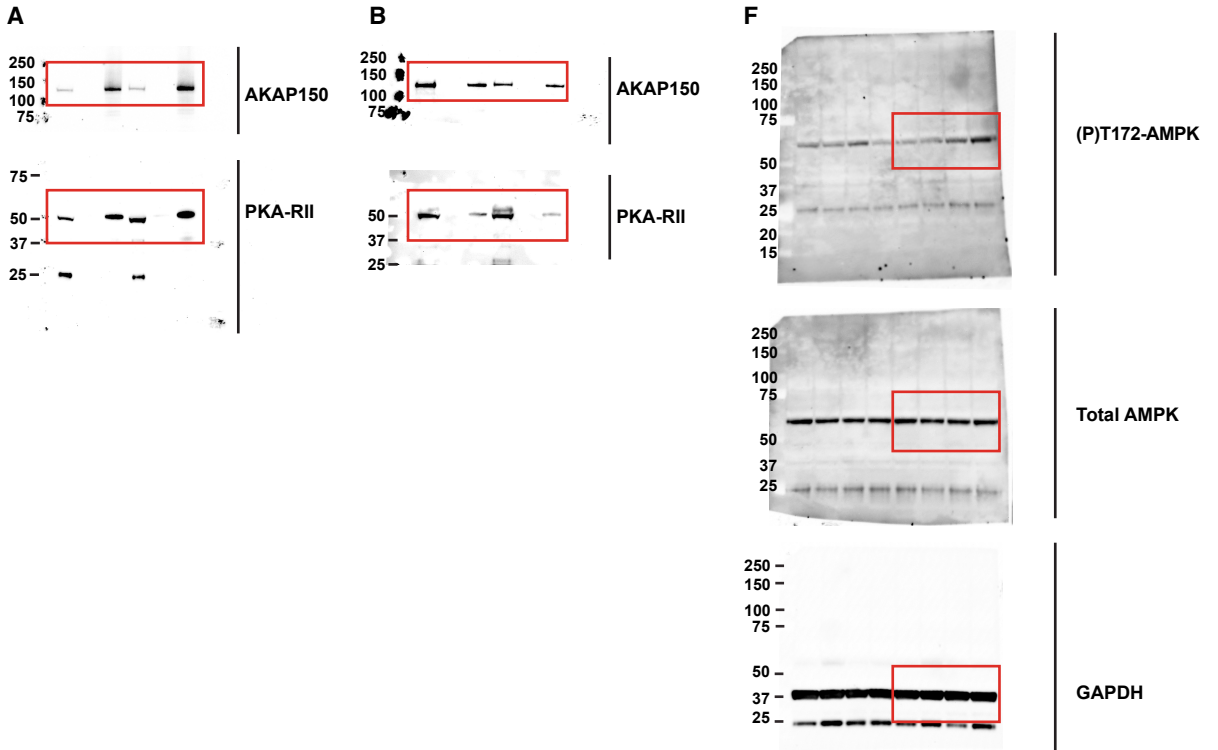

Supplement: emboj2012244s10.pdf [file emboj2012244s10.pdf]

**Fig. 1 Source Data**

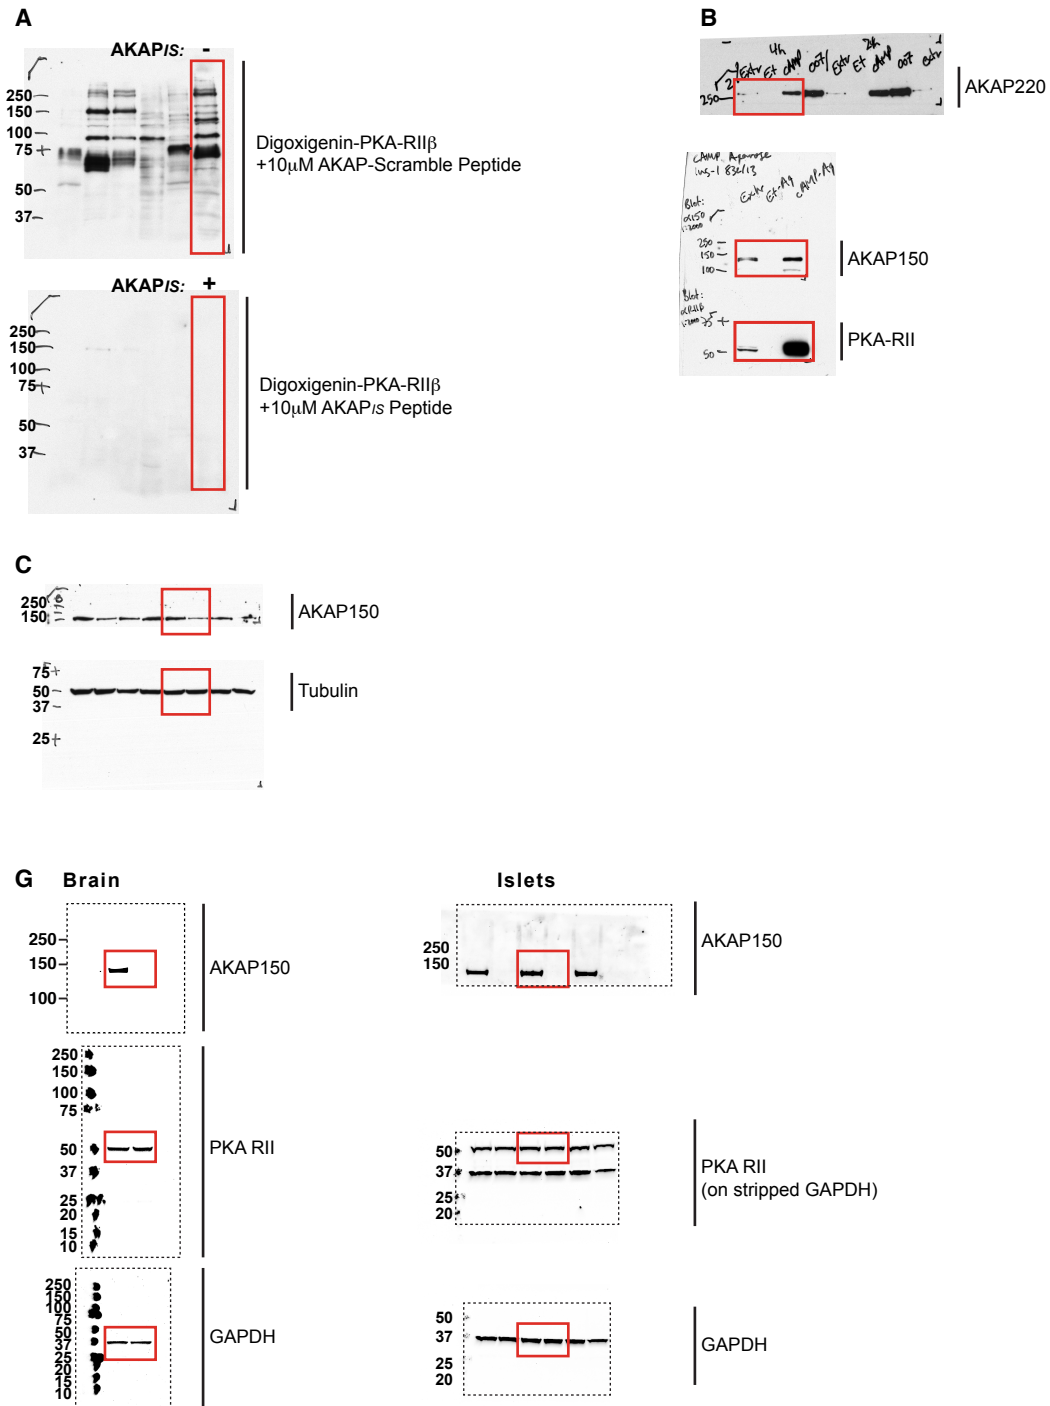

Supplement: emboj2012244s2.pdf [file emboj2012244s2.pdf]

**Fig. 3 Source Data**

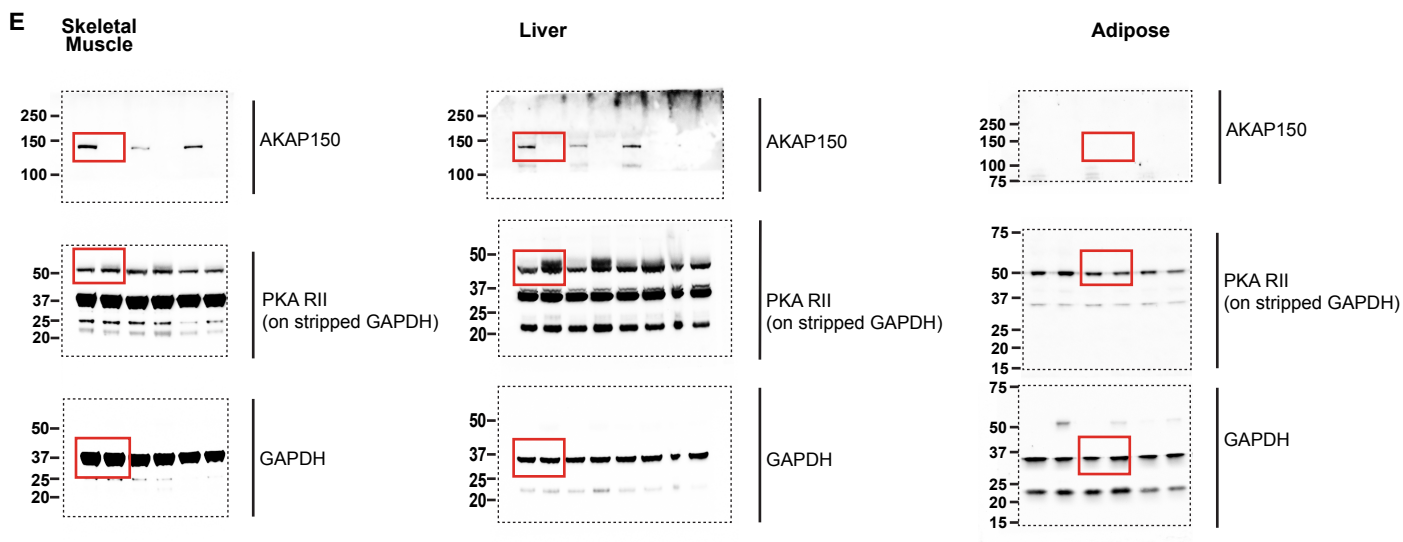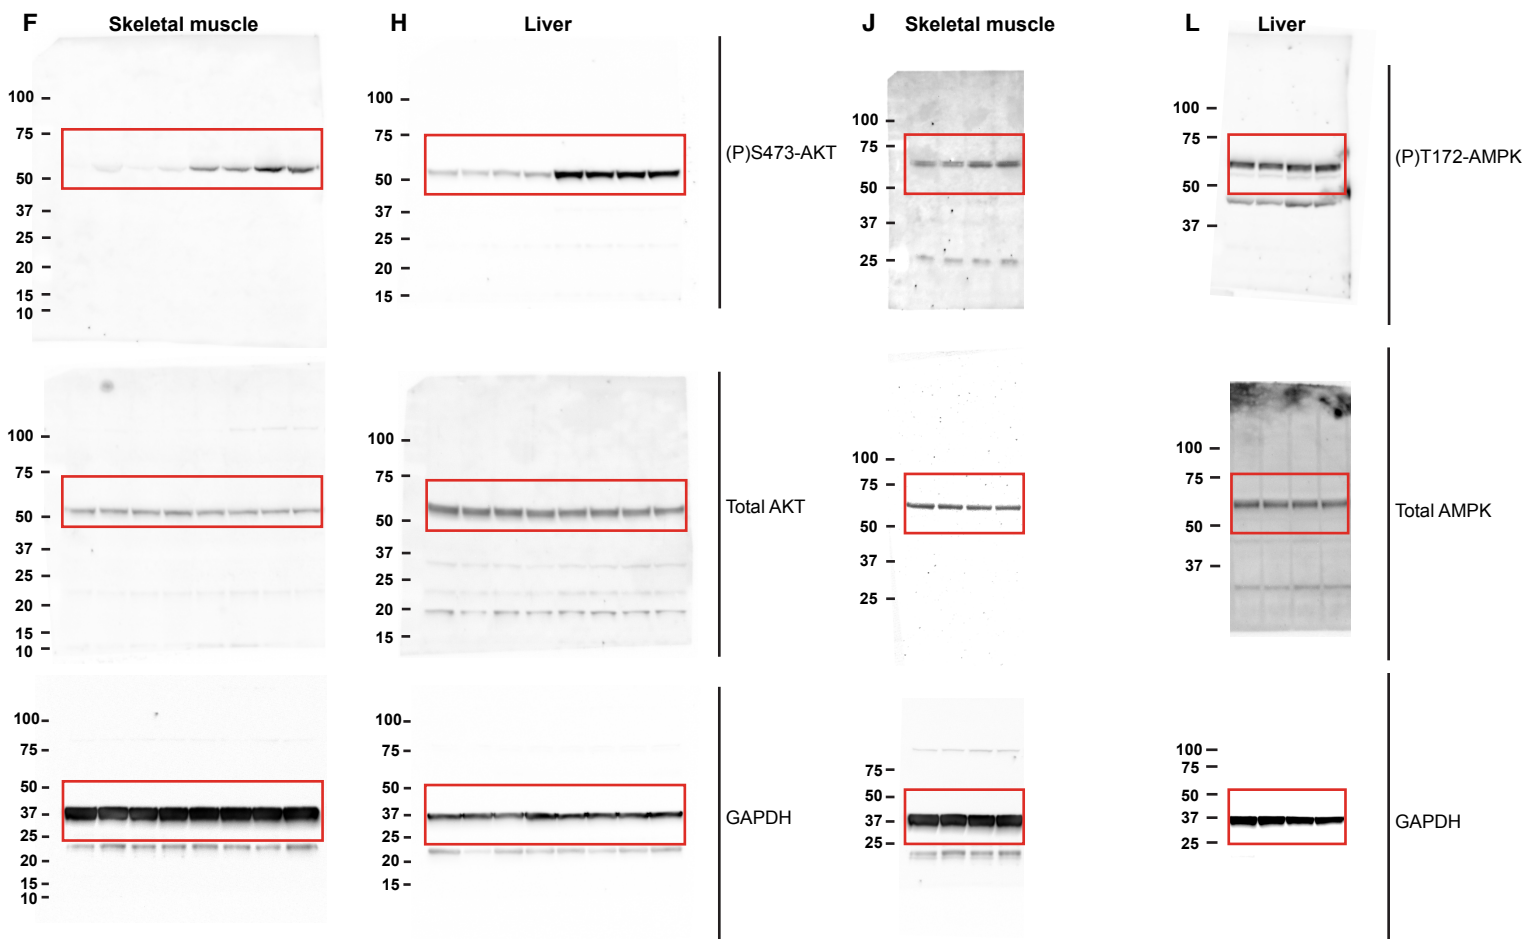

Supplement: emboj2012244s3.pdf [file emboj2012244s3.pdf]

**Fig. 4 Source Data**

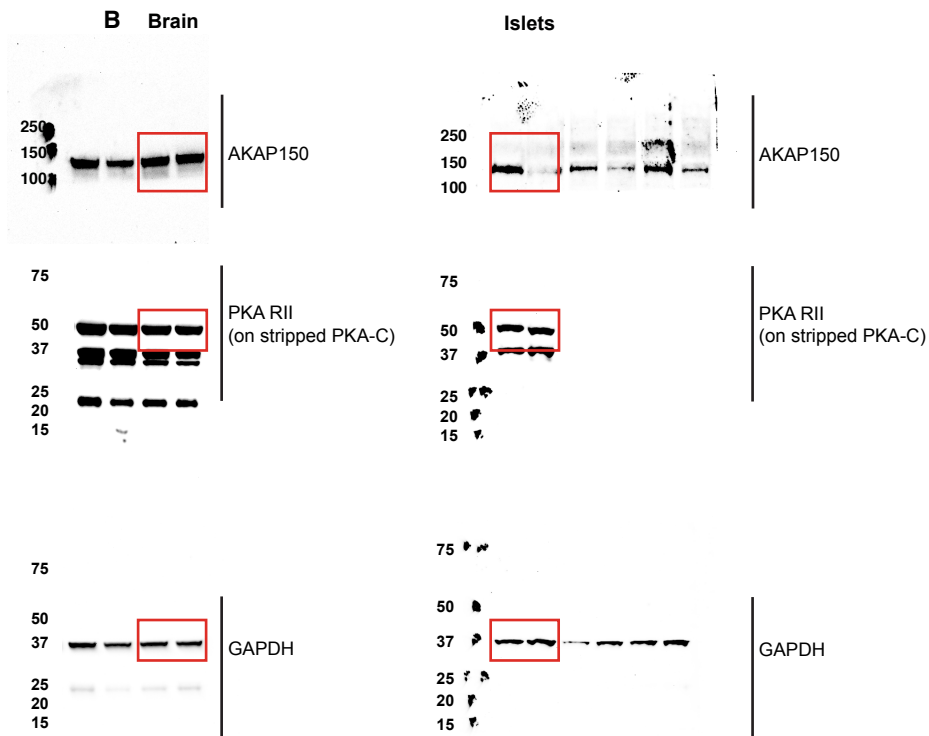

Supplement: emboj2012244s4.pdf [file emboj2012244s4.pdf]

Fig. 5 Source Data

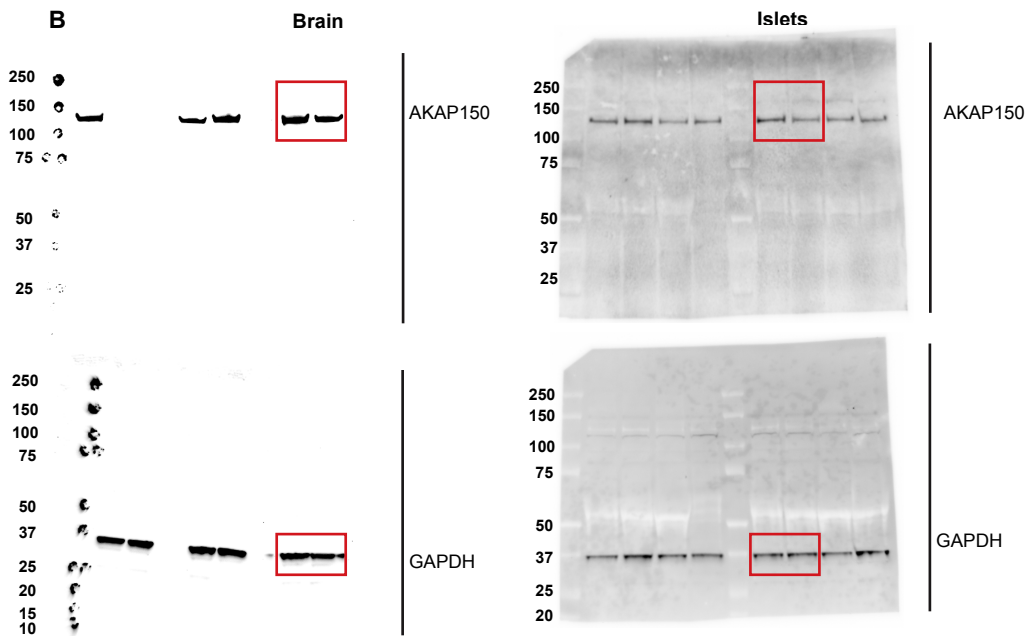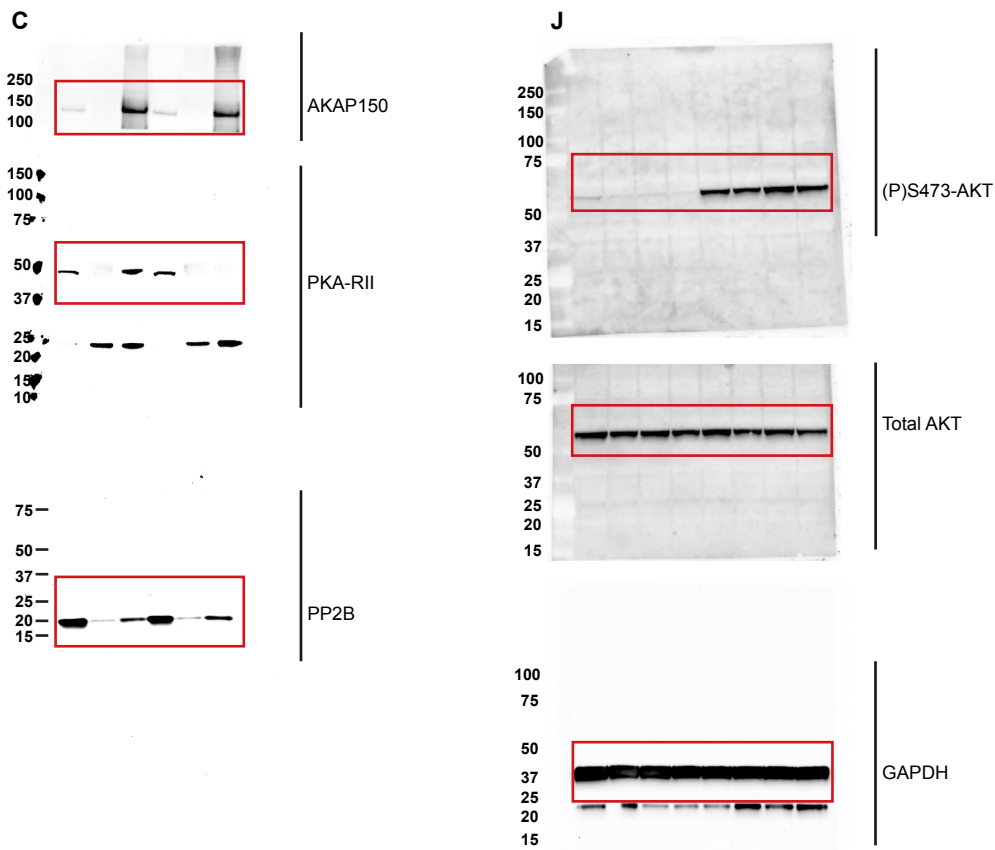

Supplement: emboj2012244s5.pdf [file emboj2012244s5.pdf]

**Fig. 6 Source Data**

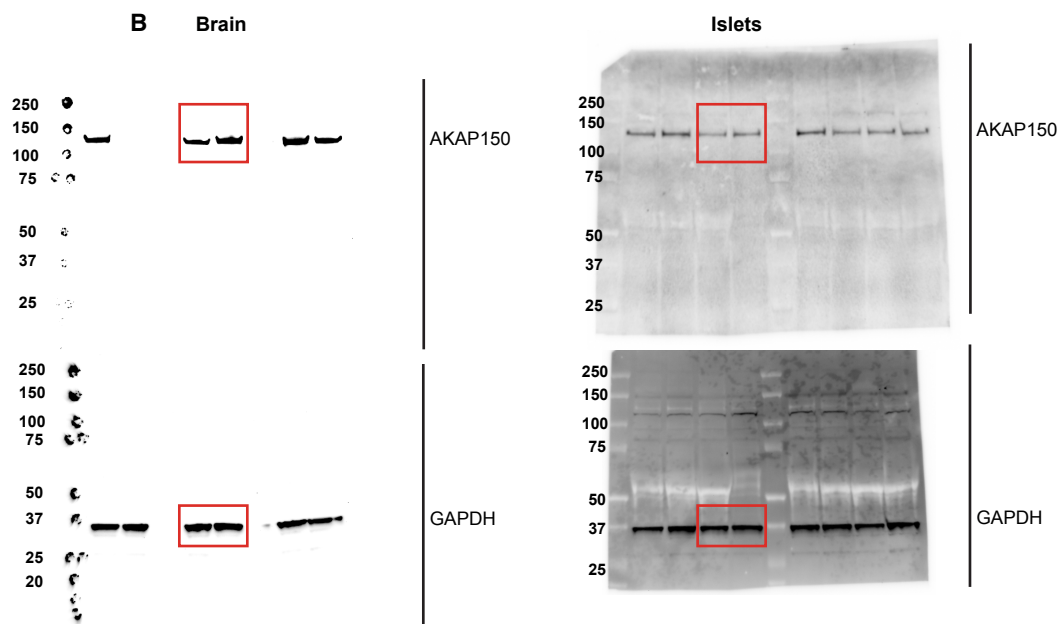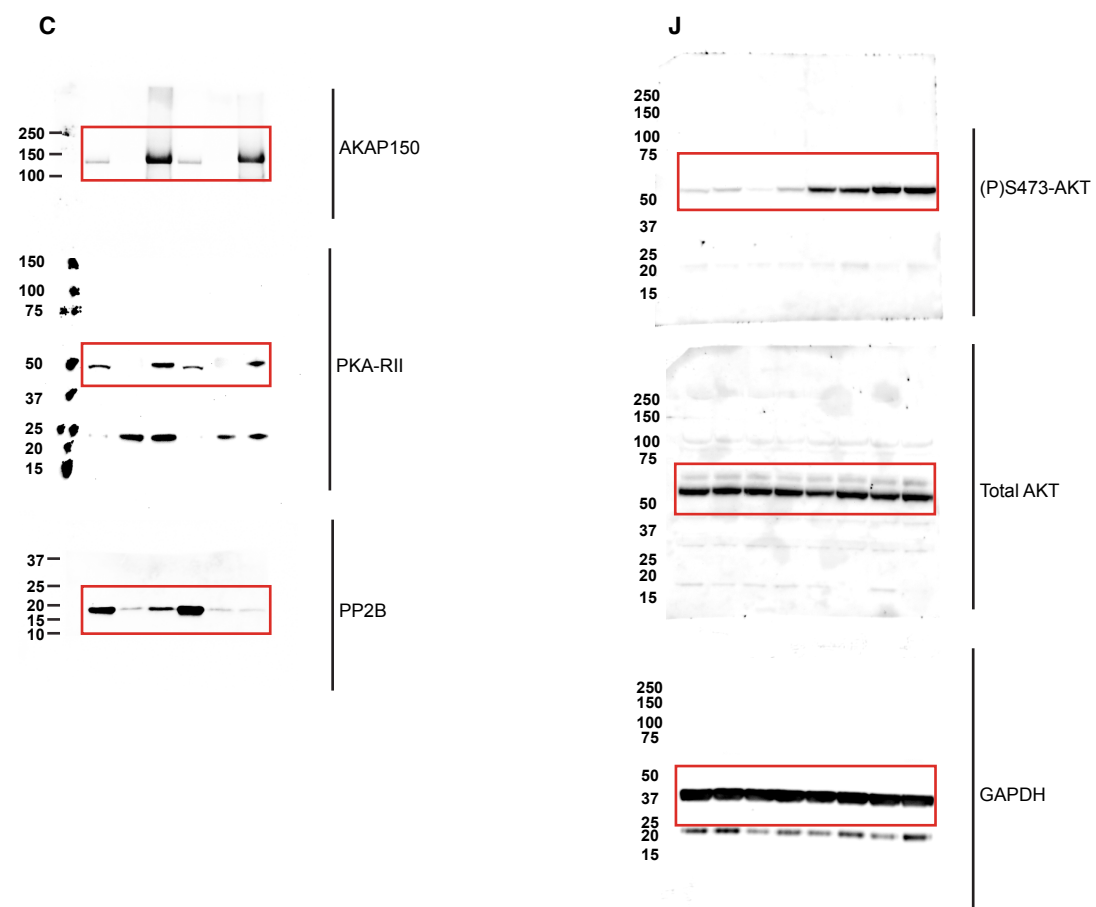

Supplement: emboj2012244s6.pdf [file emboj2012244s6.pdf]

Fig. S1 Source Data

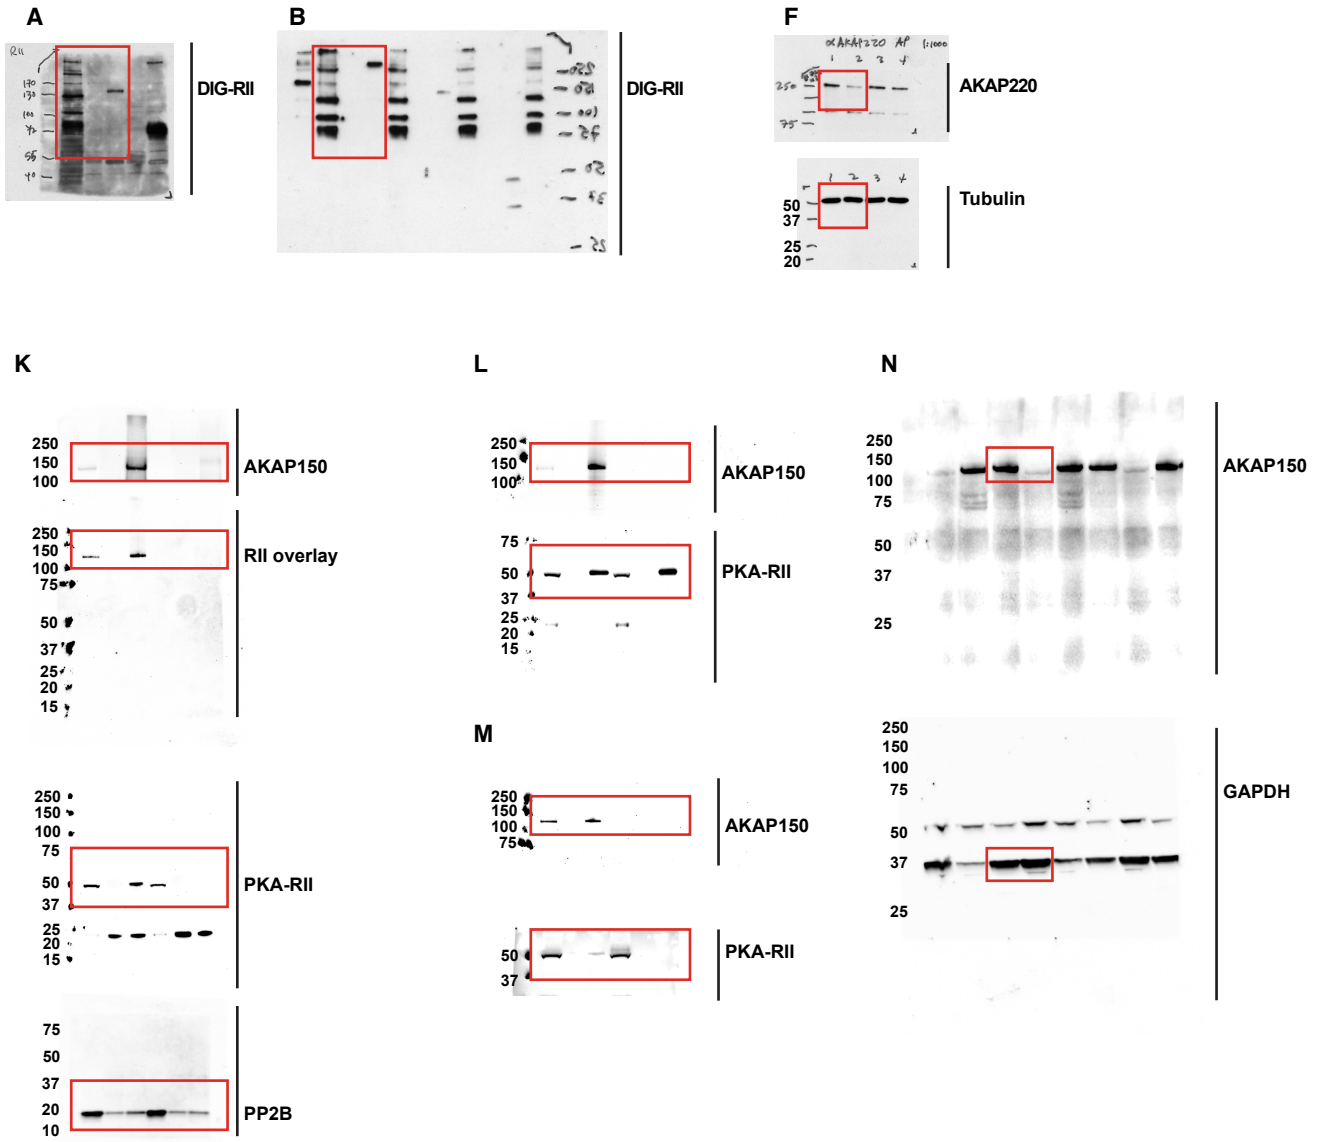

Supplement: emboj2012244s7.pdf [file emboj2012244s7.pdf]

Fig. S3 Source Data

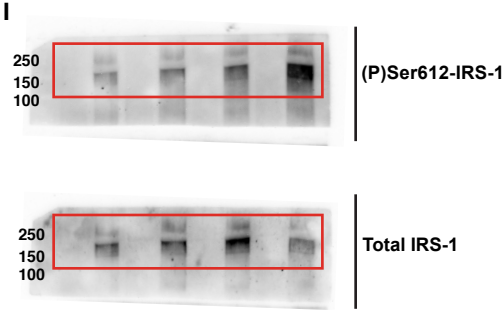

Supplement: emboj2012244s8.pdf [file emboj2012244s8.pdf]

Fig. S5 Source Data

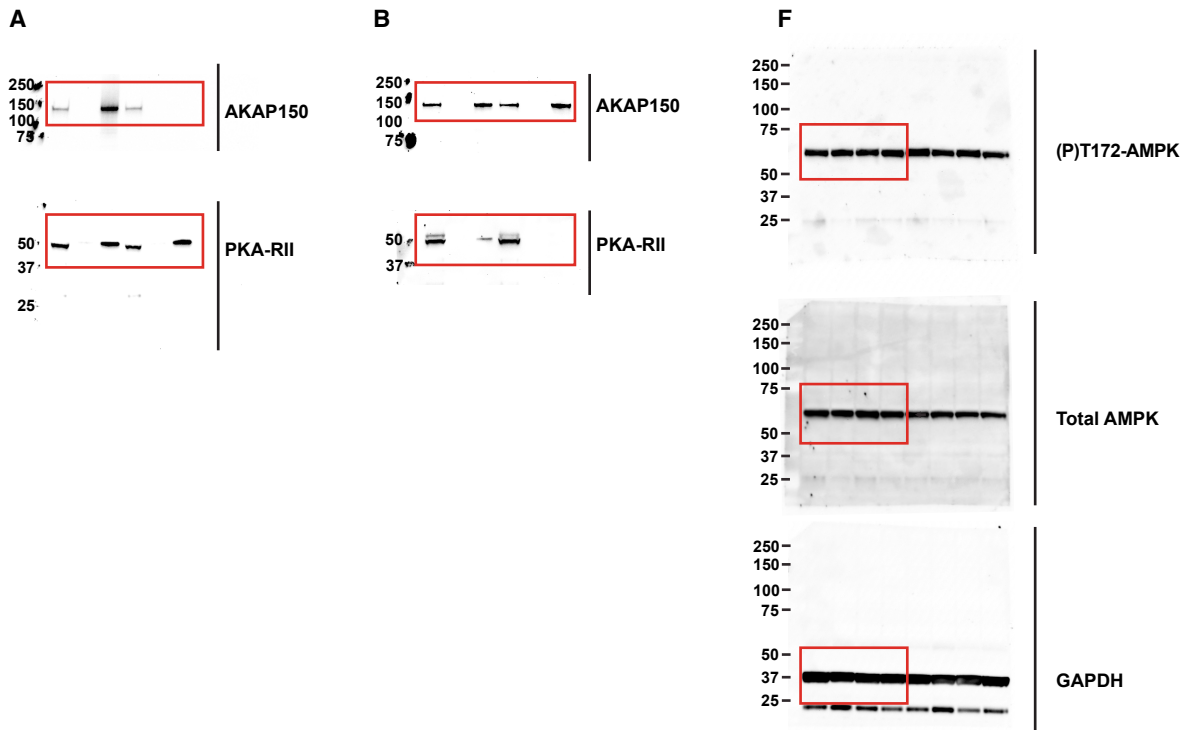

Supplement: emboj2012244s9.pdf [file emboj2012244s9.pdf]
